# Supplementary material
Source: MDPI journal article supplement (https://www.mdpi.com/2071-1050/11/20/5695)
Supplement: s1 [file s1]

rank\_num

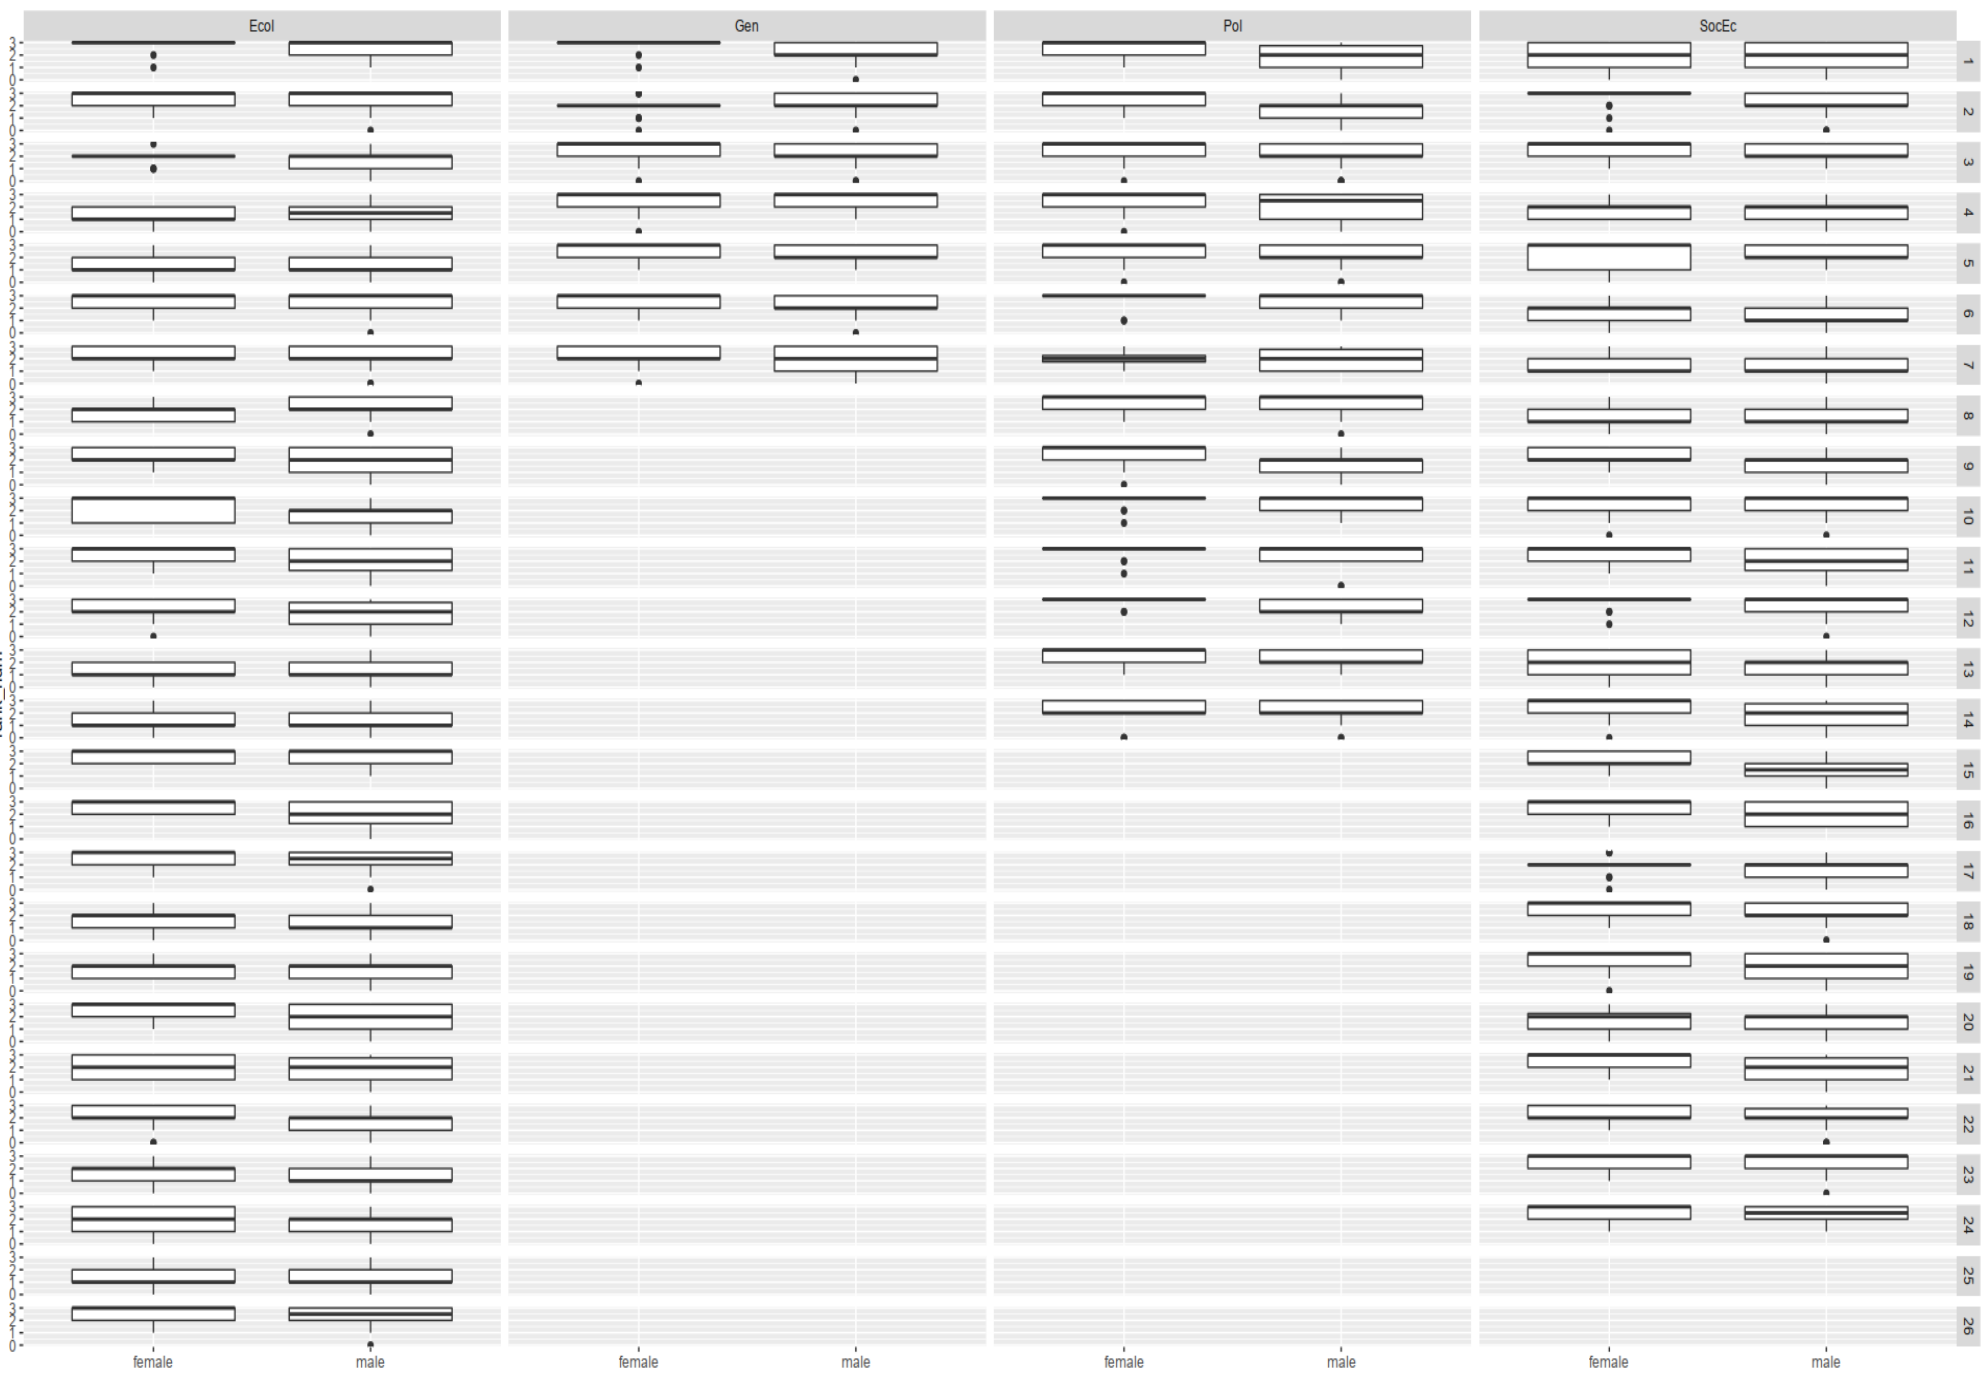

a)

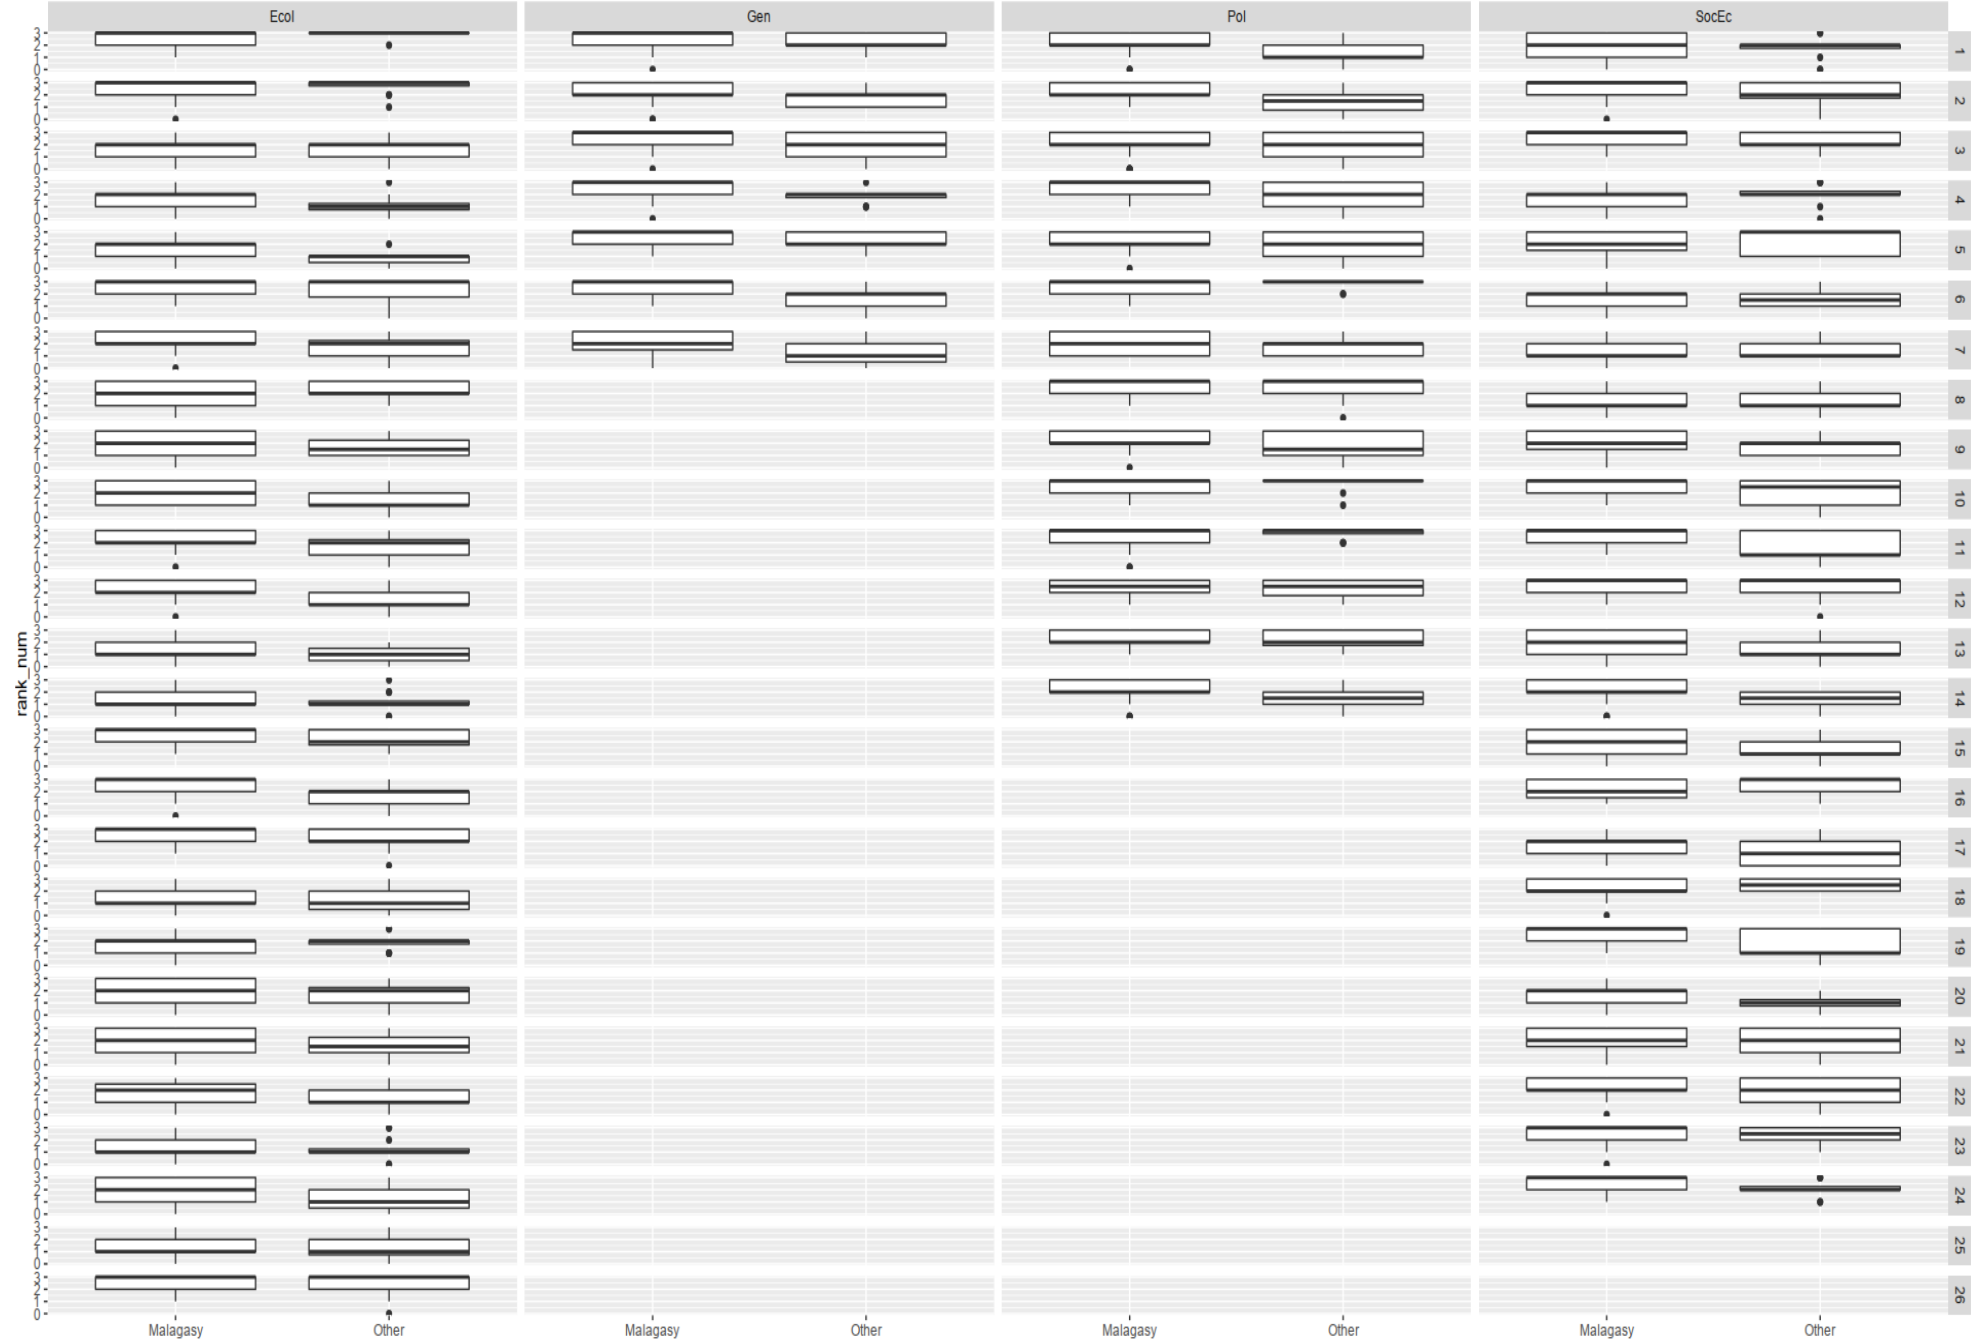

b)

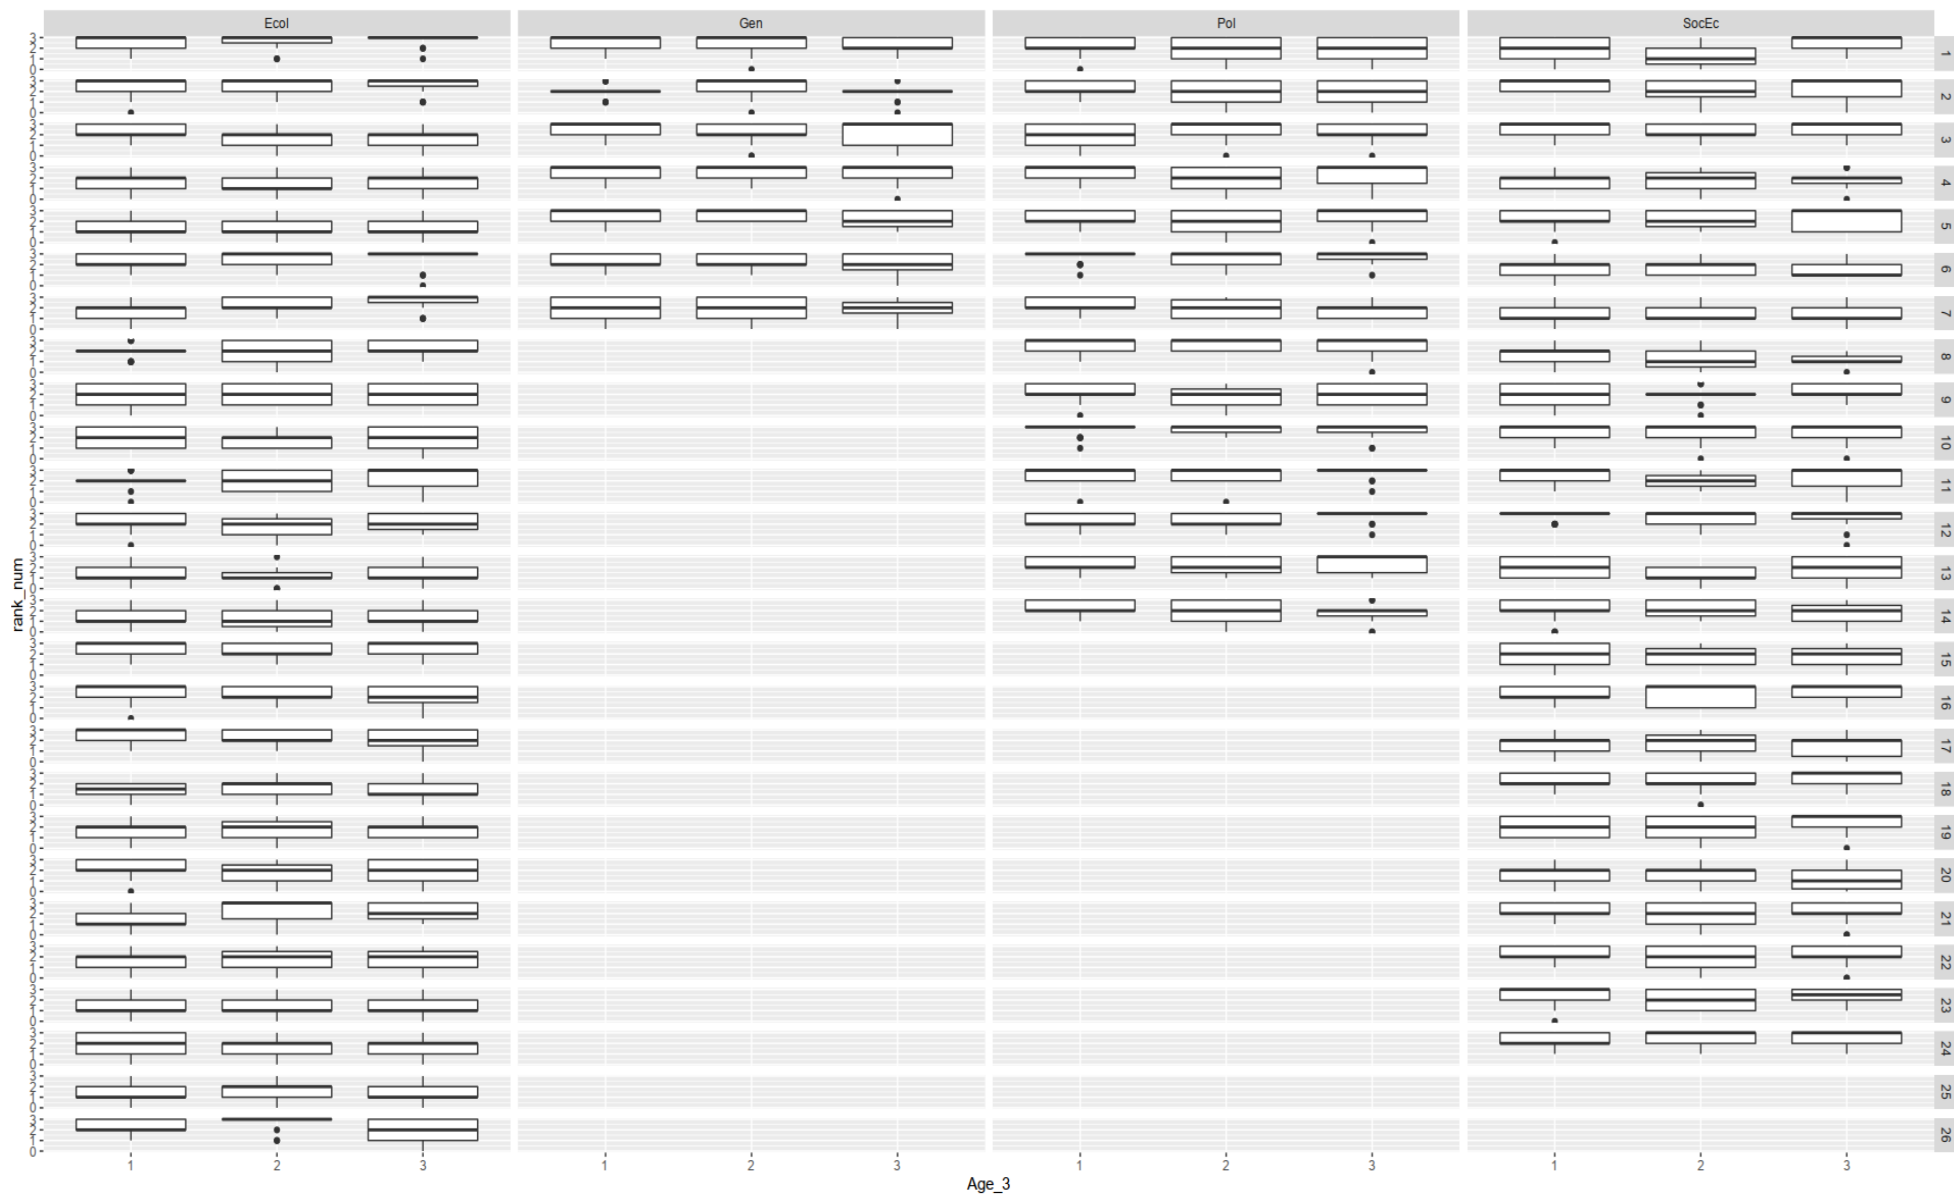

c)

**Figure S1.** Differences in mean ranking scores by a) male and female participants, b) participants of Malagasy origin and “Other”, i.e. those of other nationalities, and c) participants of young (<25, 25-25), medium (35-45) or older (46-65, >65) age. rank\_num: rank number of the four ranking categories 0 (no priority) to 3 (highest priority).
