# Supplementary material
Source: MDPI journal article supplement (https://www.mdpi.com/2071-1050/11/20/5695)
Supplement: s1 [file s1]

**Table S4.** Knowledge gap rankings compared between a) female than male participants, b) Malagasy participants and those of nationalities, and (c) different age groups, i.e. of young (<25, 25-25), medium (35-45) or older age (46-65, >65). Differences have been assessed using Kruskal- tests and knowledge gaps are ordered by Holm's adjusted p-values to account for multiplicity. Significant p-values are in bold.

a)

| Category | Knowledge gap                                                                                                                                               | Statistic | p.adj          |
|----------|-------------------------------------------------------------------------------------------------------------------------------------------------------------|-----------|----------------|
| Pol      | Strategies on how accountability of institutions / governments can be strengthened                                                                          | 1.29e+01  | <b>0.00101</b> |
| Gen      | Better data quality / reliability (through meaningful baselines, long-term data and better spatial resolution and coverage, as well as ground-truthed data) | 1.19e+01  | <b>0.00169</b> |
| Pol      | Effects of conservation activities and sustainable use of biodiversity on political achievements (e.g. 2°C-target of the Paris Climate Agreement)           | 6.17e+00  | <b>0.03899</b> |
| SocEc    | Impact of plantation farming on small-holder farmers                                                                                                        | 5.64e+00  | 0.05254        |
| Pol      | Strategies on how to avoid / minimize future political crises                                                                                               | 5.55e+00  | 0.05557        |
| SocEc    | Short- / medium- / long-term costs and benefits of avoiding increasing land degradation                                                                     | 4.77e+00  | 0.08689        |
| Pol      | Effectiveness of payments for ecosystem services and certification schemes on political decisions                                                           | 4.72e+00  | 0.08934        |
| Pol      | Research on how polycentric governance (multi-stakeholder, including indigenous people) can improve conservation                                            | 4.33e+00  | 0.11252        |
| SocEc    | Drivers of societal dynamics                                                                                                                                | 4.25e+00  | 0.11744        |
| Pol      | Influence of mining companies and large plantation farmers / owners on politics                                                                             | 4.23e+00  | 0.11938        |
| Ecol     | Interacting effects of climate change on biodiversity and food production                                                                                   | 2.87e+00  | 0.13533        |
| SocEc    | Role of biodiversity protection in inequality and poverty reduction                                                                                         | 3.86e+00  | 0.14810        |
| Ecol     | Effects of climate change on biodiversity including lag effects                                                                                             | 2.65e+00  | 0.15511        |
| Ecol     | Effectiveness of payment for ecosystem services and other certification schemes on biodiversity protection                                                  | 1.87e+00  | 0.19368        |
| Gen      | Time-lag effects analyses and simulations                                                                                                                   | 2.29e+00  | 0.19528        |
| SocEc    | Effectiveness of payment for ecosystem services (PES), carbon offset schemes and other programs aiming to improve the well-being of small-holder farmers    | 1.88e+00  | 0.20430        |
| Pol      | Strategies on how competing (land / property) rights issues can be most                                                                                     | 3.31e+00  | 0.20673        |

| Category | Knowledge gap                                                                                                                                                            | Statistic | p.adj   |
|----------|--------------------------------------------------------------------------------------------------------------------------------------------------------------------------|-----------|---------|
|          | fairly addressed                                                                                                                                                         |           |         |
| SocEc    | Impact of mining operations on small-holder farmers                                                                                                                      | 2.03e+00  | 0.21533 |
| Ecol     | Effects of remaining forest vegetation ( high biodiversity) adjacent to crops on crop yields                                                                             | 2.05e+00  | 0.22795 |
| SocEc    | Better science communication with local people, including managers (what are the best ways to build trust and respect between outside advisers and the local community?) | 3.06e+00  | 0.24118 |
| Gen      | Interdisciplinary work to generate more comprehensive data sets                                                                                                          | 1.90e+00  | 0.25165 |
| Ecol     | Reaction of plant and animal species to anthropogenic as well as natural types of disturbance                                                                            | 2.98e+00  | 0.25364 |
| Ecol     | Biomass data                                                                                                                                                             | 1.83e+00  | 0.26438 |
| Ecol     | Role of introduced species (including diseases) on ecosystem functioning                                                                                                 | 1.85e+00  | 0.26659 |
| SocEc    | Potential of women empowerment concerning income diversification                                                                                                         | 2.82e+00  | 0.27966 |
| Pol      | Strategies on how to improve security from violence / theft / corruption                                                                                                 | 1.96e+00  | 0.28232 |
| Ecol     | Appropriate forest restoration methods in conjunction with biodiversity and sustainable use                                                                              | 2.76e+00  | 0.28928 |
| SocEc    | Health risks of traditional slash-and-burn farming vs more technologically and chemically improved farming in attempts to increase food production                       | 1.19e+00  | 0.29582 |
| SocEc    | Most economically efficient land use of already converted land                                                                                                           | 1.72e+00  | 0.31225 |
| Ecol     | (Spill-over) effects of increased agricultural productivity through intensification on remaining areas of native vegetation                                              | 1.55e+00  | 0.32031 |
| SocEc    | Traditional knowledge about sustainable natural resource use                                                                                                             | 1.53e+00  | 0.32375 |
| SocEc    | Role of tele-coupling / international trade in well-being of poor people                                                                                                 | 9.26e-01  | 0.33932 |
| Gen      | Data for more (appropriate) indicators to measure achievement of goals                                                                                                   | 1.86e+00  | 0.34643 |
| SocEc    | Potential of psychological research on motivational values of biodiversity conservation                                                                                  | 1.81e+00  | 0.34680 |
| Ecol     | Effectiveness of different types of biodiversity protection (ranging from strict to multiple use conservation areas)                                                     | 7.44e-01  | 0.38845 |
| SocEc    | Short- / medium- / long-term costs and benefits of protecting biodiversity                                                                                               | 2.25e+00  | 0.40004 |
| Pol      | Role of corruption in illegal activities (also beyond logging) and ways to reduce corruption                                                                             | 2.13e+00  | 0.40940 |
| Gen      | Landscape context data                                                                                                                                                   | 1.08e+00  | 0.44733 |

| Category | Knowledge gap                                                                                                                                          | Statistic | p.adj   |
|----------|--------------------------------------------------------------------------------------------------------------------------------------------------------|-----------|---------|
| Ecol     | Sustainable quotas for species harvesting in multiple-use protected areas                                                                              | 1.07e+00  | 0.45281 |
| Ecol     | Effective buffer zone and corridor dimensions                                                                                                          | 4.98e-01  | 0.48043 |
| SocEc    | (Affordable) technologies which lower the impact of agriculture on biodiversity and improve yield                                                      | 9.73e-01  | 0.48594 |
| Pol      | Roles of World Bank, philanthropists and philanthropic foundations, as well as NGOs in mitigating poverty                                              | 4.42e-01  | 0.50629 |
| Gen      | Frequent and regular scenario updates based on long-term monitoring                                                                                    | 3.99e-01  | 0.52764 |
| Pol      | Strategies to improve local conservation managers' access to scientific publications                                                                   | 3.86e-01  | 0.53420 |
| Ecol     | Impacts of slash-and-burn farming on climate and hydrological cycles                                                                                   | 3.85e-01  | 0.53476 |
| Ecol     | Spatial ecology data for the investigation of species dynamics                                                                                         | 1.55e+00  | 0.53760 |
| Ecol     | Ecosystem services (ES) at risk from slash-and-burn as well as associated extractive activities                                                        | 1.27e+00  | 0.53861 |
| Ecol     | Nutrient cycling                                                                                                                                       | 6.67e-01  | 0.55635 |
| SocEc    | Economic benefits for the local small-holder farmers from biodiversity: e.g. potential of ecotourism, PES and other offset schemes on their well-being | 1.56e+00  | 0.57979 |
| SocEc    | Alternative sources of protein for bushmeat                                                                                                            | 3.07e-01  | 0.57980 |
| Ecol     | Best place for which type (multiple-use vs strictly protected) of protected area                                                                       | 2.93e-01  | 0.58828 |
| Ecol     | Multi-trophic interactions                                                                                                                             | 4.80e-01  | 0.59350 |
| Ecol     | Long-term degradation effects from slash-burn farming and associated activities on biodiversity                                                        | 4.63e-01  | 0.62179 |
| SocEc    | Data on inequality                                                                                                                                     | 9.68e-01  | 0.63937 |
| SocEc    | Data on international land deals                                                                                                                       | 7.64e-01  | 0.65545 |
| SocEc    | Cultural aspects that hinder or could improve conservation efforts                                                                                     | 1.34e+00  | 0.66037 |
| SocEc    | Data on material footprint                                                                                                                             | 1.82e-01  | 0.66992 |
| Pol      | Research on what social safety-nets are needed to protect people from chronic poverty (and future threats linked to climate change)                    | 1.80e-01  | 0.67161 |
| Ecol     | Genetic diversity data                                                                                                                                 | 9.00e-01  | 0.67221 |
| Gen      | Data and meta-data availability (through digitalization)                                                                                               | 1.18e-01  | 0.73099 |
| SocEc    | Data on illegal activities and corruption                                                                                                              | 1.04e-01  | 0.74697 |
| Ecol     | Species behavioral data                                                                                                                                | 1.25e+00  | 0.78848 |

| Category | Knowledge gap                                                                      | Statistic | p.adj   |
|----------|------------------------------------------------------------------------------------|-----------|---------|
| Pol      | Strategies on how to improve justice / fairness / enforcement of laws / rules      | 7.06e-01  | 0.79487 |
| Ecol     | Time required for regeneration of dry forests, including functional aspects and ES | 1.02e-01  | 0.82245 |
| Ecol     | Appropriate livestock management practices and fire regimes                        | 2.72e-02  | 0.86907 |
| Ecol     | Carbon stock data                                                                  | 1.48e-02  | 0.90304 |
| SocEc    | Data on capacity building                                                          | 1.95e-02  | 0.92477 |
| Ecol     | Functional / phylogenetic data                                                     | 1.75e-02  | 0.93083 |
| Pol      | Strategies to improve long-term funding                                            | 6.68e-03  | 0.93486 |
| Ecol     | Taxonomic data (particularly for groups other than higher plants and vertebrates)  | 1.00e-03  | 0.97476 |
| SocEc    | Effectiveness of education and awareness raising on biodiversity conservation      | 1.35e-04  | 0.99073 |

b)

| Category   | Knowledge gap                                                                                                                                            | Statistic    | p.adj         |
|------------|----------------------------------------------------------------------------------------------------------------------------------------------------------|--------------|---------------|
| <b>Gen</b> | <b>Frequent and regular scenario updates based on long-term monitoring</b>                                                                               | <b>16.29</b> | <b>0.0182</b> |
| Ecol       | Carbon stock data                                                                                                                                        | 12.30        | 0.0926        |
| Ecol       | Effects of climate change on biodiversity including lag effects                                                                                          | 12.29        | 0.0930        |
| SocEc      | Effectiveness of payment for ecosystem services (PES), carbon offset schemes and other programs aiming to improve the well-being of small-holder farmers | 11.67        | 0.1189        |
| Ecol       | Interacting effects of climate change on biodiversity and food production                                                                                | 10.91        | 0.1353        |
| Pol        | Effects of conservation activities and sustainable use of biodiversity on political achievements (e.g. 2°C-target of the Paris Climate Agreement)        | 8.75         | 0.1793        |
| Ecol       | Effectiveness of payment for ecosystem services and other certification schemes on biodiversity protection                                               | 8.63         | 0.1937        |
| Gen        | Time-lag effects analyses and simulations                                                                                                                | 8.72         | 0.1953        |
| SocEc      | Role of biodiversity protection in inequality and poverty reduction                                                                                      | 8.30         | 0.2108        |

| Category | Knowledge gap                                                                                                                                                            | Statistic | p.adj  |
|----------|--------------------------------------------------------------------------------------------------------------------------------------------------------------------------|-----------|--------|
| SocEc    | Impact of mining operations on small-holder farmers                                                                                                                      | 8.68      | 0.2153 |
| Ecol     | Effects of remaining forest vegetation ( high biodiversity) adjacent to crops on crop yields                                                                             | 8.23      | 0.2280 |
| SocEc    | Impact of plantation farming on small-holder farmers                                                                                                                     | 7.11      | 0.2406 |
| Ecol     | Biomass data                                                                                                                                                             | 9.63      | 0.2589 |
| SocEc    | Better science communication with local people, including managers (what are the best ways to build trust and respect between outside advisers and the local community?) | 6.50      | 0.2610 |
| Pol      | Strategies on how to improve security from violence / theft / corruption                                                                                                 | 7.47      | 0.2823 |
| SocEc    | Health risks of traditional slash-and-burn farming vs more technologically and chemically improved farming in attempts to increase food production                       | 6.11      | 0.2958 |
| Pol      | Strategies on how to avoid / minimize future political crises                                                                                                            | 6.49      | 0.3028 |
| Pol      | Strategies to improve local conservation managers' access to scientific publications                                                                                     | 9.19      | 0.3047 |
| Pol      | Effectiveness of payments for ecosystem services and certification schemes on political decisions                                                                        | 6.64      | 0.3092 |
| SocEc    | Most economically efficient land use of already converted land                                                                                                           | 7.17      | 0.3122 |
| Gen      | Better data quality / reliability (through meaningful baselines, long-term data and better spatial resolution and coverage, as well as ground-truthed data)              | 5.90      | 0.3157 |
| Ecol     | Role of introduced species (including diseases) on ecosystem functioning                                                                                                 | 5.90      | 0.3157 |
| Ecol     | (Spill-over) effects of increased agricultural productivity through intensification on remaining areas of native vegetation                                              | 8.96      | 0.3203 |
| SocEc    | Traditional knowledge about sustainable natural resource use                                                                                                             | 8.04      | 0.3237 |
| SocEc    | Role of tele-coupling / international trade in well-being of poor people                                                                                                 | 6.48      | 0.3393 |
| SocEc    | Drivers of societal dynamics                                                                                                                                             | 5.61      | 0.3461 |
| Gen      | Data for more (appropriate) indicators to measure achievement of goals                                                                                                   | 6.86      | 0.3464 |

| Category | Knowledge gap                                                                                                        | Statistic | p.adj  |
|----------|----------------------------------------------------------------------------------------------------------------------|-----------|--------|
| SocEc    | Potential of psychological research on motivational values of biodiversity conservation                              | 6.86      | 0.3468 |
| Ecol     | Effective buffer zone and corridor dimensions                                                                        | 6.67      | 0.3697 |
| SocEc    | Alternative sources of protein for bushmeat                                                                          | 6.67      | 0.3699 |
| Ecol     | Effectiveness of different types of biodiversity protection (ranging from strict to multiple use conservation areas) | 7.12      | 0.3884 |
| Gen      | Landscape context data                                                                                               | 8.44      | 0.4008 |
| Pol      | Role of corruption in illegal activities (also beyond logging) and ways to reduce corruption                         | 6.36      | 0.4094 |
| Gen      | Interdisciplinary work to generate more comprehensive data sets                                                      | 4.90      | 0.4283 |
| SocEc    | Data on illegal activities and corruption                                                                            | 8.23      | 0.4324 |
| Ecol     | Sustainable quotas for species harvesting in multiple-use protected areas                                            | 6.98      | 0.4528 |
| Pol      | Roles of World Bank, philanthropists and philanthropic foundations, as well as NGOs in mitigating poverty            | 3.76      | 0.5063 |
| SocEc    | Effectiveness of education and awareness raising on biodiversity conservation                                        | 7.64      | 0.5321 |
| Ecol     | Impacts of slash-and-burn farming on climate and hydrological cycles                                                 | 5.41      | 0.5348 |
| Ecol     | Spatial ecology data for the investigation of species dynamics                                                       | 5.50      | 0.5376 |
| Ecol     | Ecosystem services (ES) at risk from slash-and-burn as well as associated extractive activities                      | 4.36      | 0.5386 |
| Ecol     | Reaction of plant and animal species to anthropogenic as well as natural types of disturbance                        | 4.06      | 0.5411 |
| Pol      | Influence of mining companies and large plantation farmers / owners on politics                                      | 5.29      | 0.5444 |
| Ecol     | Nutrient cycling                                                                                                     | 3.95      | 0.5563 |
| Ecol     | Best place for which type (multiple-use vs strictly protected) of protected area                                     | 5.36      | 0.5600 |
| Pol      | Research on how polycentric governance (multi-stakeholder, including indigenous people) can improve conservation     | 5.32      | 0.5676 |
| Ecol     | Appropriate livestock management practices and fire regimes                                                          | 7.42      | 0.5736 |

| Category | Knowledge gap                                                                                                                                          | Statistic | p.adj  |
|----------|--------------------------------------------------------------------------------------------------------------------------------------------------------|-----------|--------|
| SocEc    | Economic benefits for the local small-holder farmers from biodiversity: e.g. potential of ecotourism, PES and other offset schemes on their well-being | 4.95      | 0.5798 |
| Ecol     | Multi-trophic interactions                                                                                                                             | 4.83      | 0.5935 |
| Gen      | Data and meta-data availability (through digitalization)                                                                                               | 5.12      | 0.6028 |
| Ecol     | Long-term degradation effects from slash-burn farming and associated activities on biodiversity                                                        | 3.51      | 0.6218 |
| Pol      | Strategies on how competing (land / property) rights issues can be most fairly addressed                                                               | 3.49      | 0.6249 |
| SocEc    | Data on inequality                                                                                                                                     | 3.90      | 0.6394 |
| SocEc    | Data on international land deals                                                                                                                       | 4.72      | 0.6554 |
| SocEc    | Data on material footprint                                                                                                                             | 4.51      | 0.6699 |
| Pol      | Research on what social safety-nets are needed to protect people from chronic poverty (and future threats linked to climate change)                    | 5.74      | 0.6716 |
| Ecol     | Genetic diversity data                                                                                                                                 | 3.18      | 0.6722 |
| SocEc    | (Affordable) technologies which lower the impact of agriculture on biodiversity and improve yield                                                      | 2.94      | 0.7092 |
| SocEc    | Potential of women empowerment concerning income diversification                                                                                       | 2.79      | 0.7322 |
| Pol      | Strategies on how accountability of institutions / governments can be strengthened                                                                     | 2.69      | 0.7472 |
| SocEc    | Short- / medium- / long-term costs and benefits of protecting biodiversity                                                                             | 2.45      | 0.7898 |
| Pol      | Strategies on how to improve justice / fairness / enforcement of laws / rules                                                                          | 3.41      | 0.7949 |
| SocEc    | Cultural aspects that hinder or could improve conservation efforts                                                                                     | 2.38      | 0.7952 |
| Ecol     | Species behavioral data                                                                                                                                | 4.08      | 0.8079 |
| Ecol     | Time required for regeneration of dry forests, including functional aspects and ES                                                                     | 2.19      | 0.8225 |
| Pol      | Strategies to improve long-term funding                                                                                                                | 4.72      | 0.8539 |
| Ecol     | Appropriate forest restoration methods in conjunction with biodiversity and sustainable use                                                            | 3.63      | 0.8686 |

| Category | Knowledge gap                                                                           | Statistic | p.adj  |
|----------|-----------------------------------------------------------------------------------------|-----------|--------|
| Ecol     | Taxonomic data (particularly for groups other than higher plants and vertebrates)       | 3.62      | 0.9070 |
| SocEc    | Short- / medium- / long-term costs and benefits of avoiding increasing land degradation | 1.51      | 0.9117 |
| SocEc    | Data on capacity building                                                               | 3.98      | 0.9248 |
| Ecol     | Functional / phylogenetic data                                                          | 4.43      | 0.9308 |

c)

| Category | Knowledge gap                                                                                                                                                            | Statistic | p.adj  |
|----------|--------------------------------------------------------------------------------------------------------------------------------------------------------------------------|-----------|--------|
| Ecol     | Effective buffer zone and corridor dimensions                                                                                                                            | 11.268    | 0.0711 |
| SocEc    | Health risks of traditional slash-and-burn farming vs more technologically and chemically improved farming in attempts to increase food production                       | 10.738    | 0.0890 |
| Gen      | Interdisciplinary work to generate more comprehensive data sets                                                                                                          | 9.784     | 0.1327 |
| SocEc    | Alternative sources of protein for bushmeat                                                                                                                              | 9.644     | 0.1406 |
| Ecol     | Time required for regeneration of dry forests, including functional aspects and ES                                                                                       | 9.132     | 0.1736 |
| Ecol     | Interacting effects of climate change on biodiversity and food production                                                                                                | 6.104     | 0.1915 |
| Ecol     | Effectiveness of payment for ecosystem services and other certification schemes on biodiversity protection                                                               | 6.074     | 0.1937 |
| SocEc    | Effectiveness of payment for ecosystem services (PES), carbon offset schemes and other programs aiming to improve the well-being of small-holder farmers                 | 5.932     | 0.2043 |
| SocEc    | Impact of mining operations on small-holder farmers                                                                                                                      | 5.791     | 0.2153 |
| SocEc    | Impact of plantation farming on small-holder farmers                                                                                                                     | 5.490     | 0.2406 |
| SocEc    | Better science communication with local people, including managers (what are the best ways to build trust and respect between outside advisers and the local community?) | 5.921     | 0.2610 |
| Ecol     | Role of introduced species (including diseases) on ecosystem functioning                                                                                                 | 6.302     | 0.2666 |



| Category | Knowledge gap                                                                                                                                               | Statistic | p.adj  |
|----------|-------------------------------------------------------------------------------------------------------------------------------------------------------------|-----------|--------|
| Pol      | Strategies on how to avoid / minimize future political crises                                                                                               | 4.853     | 0.3028 |
| Pol      | Strategies on how accountability of institutions / governments can be strengthened                                                                          | 5.945     | 0.3049 |
| Pol      | Effectiveness of payments for ecosystem services and certification schemes on political decisions                                                           | 4.793     | 0.3092 |
| Gen      | Better data quality / reliability (through meaningful baselines, long-term data and better spatial resolution and coverage, as well as ground-truthed data) | 5.558     | 0.3157 |
| Pol      | Strategies to improve local conservation managers' access to scientific publications                                                                        | 5.823     | 0.3192 |
| Ecol     | Long-term degradation effects from slash-burn farming and associated activities on biodiversity                                                             | 7.540     | 0.3298 |
| SocEc    | Role of tele-coupling / international trade in well-being of poor people                                                                                    | 4.527     | 0.3393 |
| SocEc    | Drivers of societal dynamics                                                                                                                                | 4.594     | 0.3461 |
| SocEc    | Role of biodiversity protection in inequality and poverty reduction                                                                                         | 4.438     | 0.3500 |
| Gen      | Data for more (appropriate) indicators to measure achievement of goals                                                                                      | 4.233     | 0.3754 |
| Pol      | Effects of conservation activities and sustainable use of biodiversity on political achievements (e.g. 2°C-target of the Paris Climate Agreement)           | 4.183     | 0.3818 |
| Ecol     | Effectiveness of different types of biodiversity protection (ranging from strict to multiple use conservation areas)                                        | 4.350     | 0.3884 |
| Ecol     | Effects of climate change on biodiversity including lag effects                                                                                             | 4.025     | 0.4027 |
| Ecol     | Biomass data                                                                                                                                                | 3.846     | 0.4273 |
| SocEc    | Traditional knowledge about sustainable natural resource use                                                                                                | 3.810     | 0.4323 |
| SocEc    | Most economically efficient land use of already converted land                                                                                              | 3.667     | 0.4530 |
| SocEc    | (Affordable) technologies which lower the impact of agriculture on biodiversity and improve yield                                                           | 5.989     | 0.4859 |
| Pol      | Roles of World Bank, philanthropists and philanthropic foundations, as well as NGOs in mitigating poverty                                                   | 4.692     | 0.5063 |
| SocEc    | Data on illegal activities and corruption                                                                                                                   | 4.457     | 0.5214 |

| Category | Knowledge gap                                                                                                                                          | Statistic | p.adj  |
|----------|--------------------------------------------------------------------------------------------------------------------------------------------------------|-----------|--------|
| Ecol     | (Spill-over) effects of increased agricultural productivity through intensification on remaining areas of native vegetation                            | 3.203     | 0.5245 |
| Gen      | Frequent and regular scenario updates based on long-term monitoring                                                                                    | 3.544     | 0.5276 |
| Ecol     | Reaction of plant and animal species to anthropogenic as well as natural types of disturbance                                                          | 4.387     | 0.5343 |
| Ecol     | Impacts of slash-and-burn farming on climate and hydrological cycles                                                                                   | 3.874     | 0.5348 |
| Pol      | Strategies on how to improve security from violence / theft / corruption                                                                               | 3.083     | 0.5440 |
| Pol      | Influence of mining companies and large plantation farmers / owners on politics                                                                        | 3.081     | 0.5444 |
| Gen      | Landscape context data                                                                                                                                 | 3.010     | 0.5562 |
| Ecol     | Nutrient cycling                                                                                                                                       | 4.483     | 0.5563 |
| Ecol     | Best place for which type (multiple-use vs strictly protected) of protected area                                                                       | 5.107     | 0.5600 |
| Ecol     | Effects of remaining forest vegetation ( high biodiversity) adjacent to crops on crop yields                                                           | 2.894     | 0.5758 |
| SocEc    | Economic benefits for the local small-holder farmers from biodiversity: e.g. potential of ecotourism, PES and other offset schemes on their well-being | 2.870     | 0.5798 |
| Ecol     | Multi-trophic interactions                                                                                                                             | 2.790     | 0.5935 |
| Gen      | Data and meta-data availability (through digitalization)                                                                                               | 4.097     | 0.6028 |
| Pol      | Strategies on how competing (land / property) rights issues can be most fairly addressed                                                               | 2.977     | 0.6249 |
| Pol      | Research on how polycentric governance (multi-stakeholder, including indigenous people) can improve conservation                                       | 2.568     | 0.6326 |
| SocEc    | Data on inequality                                                                                                                                     | 2.529     | 0.6394 |
| Ecol     | Carbon stock data                                                                                                                                      | 3.820     | 0.6464 |
| SocEc    | Data on international land deals                                                                                                                       | 2.440     | 0.6554 |
| SocEc    | Cultural aspects that hinder or could improve conservation efforts                                                                                     | 3.755     | 0.6604 |
| SocEc    | Data on material footprint                                                                                                                             | 3.332     | 0.6699 |

| Category | Knowledge gap                                                                                                                       | Statistic | p.adj  |
|----------|-------------------------------------------------------------------------------------------------------------------------------------|-----------|--------|
| Pol      | Research on what social safety-nets are needed to protect people from chronic poverty (and future threats linked to climate change) | 2.848     | 0.6716 |
| Ecol     | Genetic diversity data                                                                                                              | 2.734     | 0.6722 |
| SocEc    | Potential of women empowerment concerning income diversification                                                                    | 3.659     | 0.6812 |
| Ecol     | Appropriate livestock management practices and fire regimes                                                                         | 3.655     | 0.6822 |
| Ecol     | Ecosystem services (ES) at risk from slash-and-burn as well as associated extractive activities                                     | 2.112     | 0.7151 |
| SocEc    | Potential of psychological research on motivational values of biodiversity conservation                                             | 1.923     | 0.7498 |
| Pol      | Role of corruption in illegal activities (also beyond logging) and ways to reduce corruption                                        | 1.776     | 0.7768 |
| SocEc    | Short- / medium- / long-term costs and benefits of protecting biodiversity                                                          | 1.705     | 0.7898 |
| Pol      | Strategies on how to improve justice / fairness / enforcement of laws / rules                                                       | 1.677     | 0.7949 |
| Ecol     | Sustainable quotas for species harvesting in multiple-use protected areas                                                           | 1.637     | 0.8021 |
| Pol      | Strategies to improve long-term funding                                                                                             | 2.932     | 0.8539 |
| Ecol     | Appropriate forest restoration methods in conjunction with biodiversity and sustainable use                                         | 1.257     | 0.8686 |
| Ecol     | Taxonomic data (particularly for groups other than higher plants and vertebrates)                                                   | 3.089     | 0.9070 |
| SocEc    | Short- / medium- / long-term costs and benefits of avoiding increasing land degradation                                             | 1.907     | 0.9117 |
| Ecol     | Species behavioral data                                                                                                             | 0.968     | 0.9146 |
| SocEc    | Data on capacity building                                                                                                           | 0.899     | 0.9248 |
| Ecol     | Functional / phylogenetic data                                                                                                      | 0.856     | 0.9308 |
| Gen      | Time-lag effects analyses and simulations                                                                                           | 0.559     | 0.9675 |
| Ecol     | Spatial ecology data for the investigation of species dynamics                                                                      | 0.388     | 0.9834 |
| SocEc    | Effectiveness of education and awareness raising on biodiversity conservation                                                       | 1.988     | 0.9907 |
