# Supplementary material
Source: MDPI journal article supplement (https://www.mdpi.com/2071-1050/11/20/5695)
Supplement: s1 [file s1]

Archive with 6 entries (6 files):
- Supplementary Material revised/S1_Questionnaire_Dry_Forest_Western_Madagascar_Final.pdf
- Supplementary Material revised/S2_Table_Background information of participating experts.pdf
- Supplementary Material revised/S3_Table_Complete ranking of all knowledge gaps.pdf
- Supplementary Material revised/S4_Table_Kruskall-Test for knowledge gaps ranking by (a) gender (b) nationality and (c) age.pdf
- Supplementary Material revised/S5_Table_Full list of suggested additional knowledge gaps.pdf
- Supplementary Material revised/S6_Figure_Background effects on ranking.pdf
