# Supplementary material
Source: MDPI journal article supplement (https://www.mdpi.com/2071-1050/11/20/5695)
Supplement: s1 [file s1 › Supplementary Material revised/S2_Table_Background information of participating experts.pdf]

**Table S2.** a) Background information of participating experts. Age groups were: 1: < 25 years, 2: 25-35, 3: 36-45, 4: 46-65, 5: > 65. Categories of time worked in Madagascar were: 1: < 1 year, 2: 1-5 years, 3: 5-10 years, 4: > 10 years. Note: two participants did not specify their Position, b) Alphabetic list of organizations of participating experts. Note: some participants were affiliated with multiple organizations. We listed here all of them.

a)

| Expert ID | Position category | Organization category | Nationality      | Age group | Gender | Category of time worked in Madagascar | Work with locals |
|-----------|-------------------|-----------------------|------------------|-----------|--------|---------------------------------------|------------------|
| 1         | lecturer          | university            | German           | 4         | female | 4                                     | yes              |
| 2         | student           | university            | German           | 2         | male   | 2                                     | yes              |
| 3         | field staff       | NGO                   | Malagasy         | 2         | male   | 4                                     | yes              |
| 4         | researcher        | university            | Malagasy         | 5         | female | 4                                     | yes              |
| 5         | project leader    | NGO                   | Malagasy         | 2         | male   | 4                                     | yes              |
| 6         | government staff  | government            | Swiss            | 3         | female | 2                                     | yes              |
| 7         | guide             | foundation            | Malagasy         | 3         | male   | 4                                     | yes              |
| 8         | researcher        | research center       | German           | 4         | male   | 2                                     | yes              |
| 9         | student           | university            | Malagasy         | 1         | female | 4                                     | yes              |
| 10        | manager           | NGO                   | Malagasy / Swiss | 4         | male   | 4                                     | yes              |
| 11        | researcher        | university            | Malagasy         | 5         | female | 4                                     | yes              |
| 12        |                   | local organization    | German           | 4         | male   | 4                                     | yes              |
| 13        | coordinator       | NGO                   | Malagasy         | 2         | female | 4                                     | yes              |
| 14        | consultant        | none                  | Malagasy         | 2         | female | 4                                     | yes              |
| 15        | lecturer          | NGO                   | Malagasy         | 4         | male   | 4                                     | yes              |
| 16        | coordinator       | UN                    | French           | 2         | male   | 3                                     | yes              |
| 17        | student           | university            | Malagasy         | 2         | female | 4                                     | yes              |
| 18        | student           | university            | German           | 3         | male   | 3                                     | yes              |
| 19        | coordinator       | NGO                   | Malagasy         | 2         | female | 4                                     | no               |
| 20        | advisor           | society               | Malagasy         | 4         | male   | 4                                     | yes              |
| 21        | researcher        | university            | Malagasy         | 2         | male   | 4                                     | yes              |
| 22        | student           | research center       | Malagasy         | 1         | male   | 4                                     | no               |
| 23        | manager           | bank                  | Malagasy         | 4         | male   | 4                                     | yes              |
| 24        |                   | society               | Malagasy         | 3         | male   | 4                                     | yes              |
| 25        | researcher        | research center       | Malagasy         | 3         | male   | 4                                     | yes              |
| 26        | field staff       | UN                    | Malagasy         | 2         | male   | 3                                     | yes              |

| Expert ID | Position category | Organization category     | Nationality | Age group | Gender | Category of time worked in Madagascar | Work with locals |
|-----------|-------------------|---------------------------|-------------|-----------|--------|---------------------------------------|------------------|
| 27        | researcher        | university                | Malagasy    | 3         | female | 4                                     | yes              |
| 28        | government staff  | government                | Malagasy    | 3         | male   | 4                                     | yes              |
| 29        | manager           | NGO                       | Malagasy    | 3         | female | 4                                     | yes              |
| 30        | researcher        | research center           | Senegalese  | 2         | male   | 2                                     | yes              |
| 31        | consultant        | NGO                       | Malagasy    | 3         | male   | 4                                     | yes              |
| 32        | researcher        | conservation center       | Malagasy    | 2         | male   | 4                                     | yes              |
| 33        | student           | university                | Malagasy    | 2         | female | 4                                     | yes              |
| 34        | tech. staff       | NGO                       | Malagasy    | 2         | male   | 4                                     | yes              |
| 35        | UN staff          | UN                        | German      | 2         | male   | 2                                     | yes              |
| 36        | tech. staff       | association               | Malagasy    | 3         | male   | 4                                     | yes              |
| 37        | tech. staff       | humanitarian organization | Malagasy    | 3         | male   | 4                                     | yes              |
| 38        | lecturer          | university                | Malagasy    | 4         | female | 4                                     | yes              |
| 39        | student           | university                | Malagasy    | 2         | female | 4                                     | yes              |
| 40        | researcher        | university                | German      | 4         | male   | 4                                     | yes              |
| 41        | tech. staff       | university                | German      | 2         | male   | 2                                     | yes              |
| 42        | researcher        | research center           | German      | 4         | female | 4                                     | yes              |
| 43        | manager           | corporation               | Malagasy    | 3         | female | 4                                     | yes              |
| 44        | researcher        | university                | Malagasy    | 4         | male   | 4                                     | yes              |
| 45        | manager           | association               | Malagasy    | 2         | male   | 4                                     | yes              |
| 46        | NGO director      | NGO                       | Malagasy    | 4         | female | 4                                     | yes              |
| 47        | manager           | foundation                | Malagasy    | 3         | male   | 4                                     | yes              |
| 48        | agriculturalist   | church                    | Malagasy    | 3         | male   | 4                                     | yes              |
| 49        | manager           | NGO                       | Malagasy    | 3         | male   | 4                                     | yes              |
| 50        | researcher        | NGO                       | Malagasy    | 2         | male   | 4                                     | yes              |
| 51        | coordinator       | NGO                       | Malagasy    | 4         | male   | 4                                     | yes              |

b)

African Development Bank  
Aga Khana Foundation Madagascar  
Association Mitsinjo  
Association ASTRES  
Catholic Relief Services  
CENRADERU

IUCN  
Kew Madagascar Conservation Centre  
Lemur Conservation Network  
Madagascar Biodiversity Partnership (MBP)  
Madagasikara Voakajy  
Madagascar Health and Environmental  
Research (MAHERY)

CIRAD

CMS Secreteriat

COKETES Project

Conservation International

Durrell Wildlife Conservation Trust

Enabel, Belgium Cooperation

Federal Office of Environment

FoFiFa

Foundation Papiliorama

German Primate Centre

GIZ

GRET (International Development NGO)

Group d'Etude et de Recherche sur les

Primates de Madagascar (GERP)

Institute Supérieur de Technologie (IST)

International Federation of red cross and  
red crescent

Observatoire Economique de la Pêche et de  
l'Aquaculture

ONG TANDAVANALA

ONG Vohimanana

RICONSULT

Social Protection and Social Nets Safety  
(World Food Programme)

Szent Istvan University

TiHo, Hannover

UN-Environment

UNIDO

Universität Göttingen

Universität Hamburg

University of Antananarivo

USAid

WWF
