# Supplementary material
Source: MDPI journal article supplement (https://www.mdpi.com/2071-1050/11/20/5695)
Supplement: s1 [file s1 › Supplementary Material revised/S3_Table_Complete ranking of all knowledge gaps.pdf]

**Table S3.** Complete ranking of all knowledge gaps. Categories are as follows: Ecol = Ecological, Gen = General, Pol = Political and SocEc = Socio-economic knowledge gap. Code refers to the number the knowledge gap was listed within its category in the questionnaire

| Category | Code | Knowledge gap                                                                                                                                                            | Mean |
|----------|------|--------------------------------------------------------------------------------------------------------------------------------------------------------------------------|------|
| Pol      | 10   | Strategies on how to improve justice / fairness / enforcement of laws / rules                                                                                            | 2.69 |
| Pol      | 6    | Role of corruption in illegal activities (also beyond logging) and ways to reduce corruption                                                                             | 2.67 |
| Ecol     | 1    | Appropriate forest restoration methods in conjunction with biodiversity and sustainable use                                                                              | 2.65 |
| SocEc    | 12   | Economic benefits for the local small-holder farmers from biodiversity: e.g. potential of ecotourism, PES and other offset schemes on their well-being                   | 2.61 |
| Pol      | 11   | Strategies on how to improve security from violence / theft / corruption                                                                                                 | 2.59 |
| Pol      | 8    | Strategies to improve long-term funding                                                                                                                                  | 2.51 |
| Ecol     | 2    | Appropriate livestock management practices and fire regimes                                                                                                              | 2.45 |
| SocEc    | 10   | Effectiveness of education and awareness raising on biodiversity conservation                                                                                            | 2.45 |
| Ecol     | 6    | Ecosystem services (ES) at risk from slash-and-burn as well as associated extractive activities                                                                          | 2.44 |
| Gen      | 4    | Frequent and regular scenario updates based on long-term monitoring                                                                                                      | 2.43 |
| SocEc    | 24   | Traditional knowledge about sustainable natural resource use                                                                                                             | 2.43 |
| Gen      | 5    | Interdisciplinary work to generate more comprehensive data sets                                                                                                          | 2.41 |
| Ecol     | 15   | Impacts of slash-and-burn farming on climate and hydrological cycles                                                                                                     | 2.39 |
| Ecol     | 17   | Long-term degradation effects from slash-burn farming and associated activities on biodiversity                                                                          | 2.39 |
| Pol      | 12   | Strategies on how accountability of institutions / governments can be strengthened                                                                                       | 2.38 |
| SocEc    | 23   | (Affordable) technologies which lower the impact of agriculture on biodiversity and improve yield                                                                        | 2.36 |
| Gen      | 1    | Better data quality / reliability (through meaningful baselines, long-term data and better spatial resolution and coverage, as well as ground-truthed data)              | 2.35 |
| SocEc    | 2    | Better science communication with local people, including managers (what are the best ways to build trust and respect between outside advisers and the local community?) | 2.35 |
| SocEc    | 3    | Cultural aspects that hinder or could improve conservation efforts                                                                                                       | 2.33 |
| SocEc    | 18   | Potential of women empowerment concerning income diversification                                                                                                         | 2.33 |
| Ecol     | 26   | Time required for regeneration of dry forests, including functional aspects and ES                                                                                       | 2.31 |
| SocEc    | 16   | Most economically efficient land use of already converted land                                                                                                           | 2.29 |
| Pol      | 13   | Strategies on how competing (land / property) rights issues can be most fairly addressed                                                                                 | 2.27 |
| Gen      | 3    | Data for more (appropriate) indicators to measure achievement of goals                                                                                                   | 2.25 |

| Category | Code | Knowledge gap                                                                                                                                            | Mean |
|----------|------|----------------------------------------------------------------------------------------------------------------------------------------------------------|------|
| Gen      | 6    | Landscape context data                                                                                                                                   | 2.24 |
| Pol      | 5    | Research on how polycentric governance (multi-stakeholder, including indigenous people) can improve conservation                                         | 2.24 |
| SocEc    | 11   | Effectiveness of payment for ecosystem services (PES), carbon offset schemes and other programs aiming to improve the well-being of small-holder farmers | 2.24 |
| Ecol     | 16   | Interacting effects of climate change on biodiversity and food production                                                                                | 2.22 |
| Pol      | 4    | Research on what social safety-nets are needed to protect people from chronic poverty (and future threats linked to climate change)                      | 2.22 |
| SocEc    | 5    | Data on illegal activities and corruption                                                                                                                | 2.18 |
| Ecol     | 7    | Effective buffer zone and corridor dimensions                                                                                                            | 2.16 |
| Ecol     | 11   | Effects of remaining forest vegetation ( high biodiversity) adjacent to crops on crop yields                                                             | 2.16 |
| Pol      | 3    | Influence of mining companies and large plantation farmers / owners on politics                                                                          | 2.14 |
| SocEc    | 19   | Role of biodiversity protection in inequality and poverty reduction                                                                                      | 2.12 |
| SocEc    | 22   | Short- / medium- / long-term costs and benefits of protecting biodiversity                                                                               | 2.10 |
| Ecol     | 8    | Effectiveness of different types of biodiversity protection (ranging from strict to multiple use conservation areas)                                     | 2.06 |
| Ecol     | 9    | (Spill-over) effects of increased agricultural productivity through intensification on remaining areas of native vegetation                              | 2.06 |
| Gen      | 2    | Data and meta-data availability (through digitalization)                                                                                                 | 2.06 |
| Pol      | 2    | Effectiveness of payments for ecosystem services and certification schemes on political decisions                                                        | 2.04 |
| Pol      | 9    | Strategies on how to avoid / minimize future political crises                                                                                            | 2.04 |
| Pol      | 14   | Strategies to improve local conservation managers' access to scientific publications                                                                     | 2.02 |
| Pol      | 1    | Effects of conservation activities and sustainable use of biodiversity on political achievements (e.g. 2°C-target of the Paris Climate Agreement)        | 2.00 |
| SocEc    | 9    | Drivers of societal dynamics                                                                                                                             | 2.00 |
| SocEc    | 14   | Impact of mining operations on small-holder farmers                                                                                                      | 2.00 |
| SocEc    | 21   | Short- / medium- / long-term costs and benefits of avoiding increasing land degradation                                                                  | 2.00 |
| Ecol     | 12   | Effects of climate change on biodiversity including lag effects                                                                                          | 1.98 |
| Ecol     | 20   | Reaction of plant and animal species to anthropogenic as well as natural types of disturbance                                                            | 1.96 |
| Ecol     | 10   | Effectiveness of payment for ecosystem services and other certification schemes on biodiversity protection                                               | 1.92 |
| Gen      | 7    | Time-lag effects analyses and simulations                                                                                                                | 1.90 |

| Category | Code | Knowledge gap                                                                                                                                      | Mean |
|----------|------|----------------------------------------------------------------------------------------------------------------------------------------------------|------|
| Pol      | 7    | Roles of World Bank, philanthropists and philanthropic foundations, as well as NGOs in mitigating poverty                                          | 1.90 |
| SocEc    | 1    | Alternative sources of protein for bushmeat                                                                                                        | 1.88 |
| Ecol     | 21   | Role of introduced species (including diseases) on ecosystem functioning                                                                           | 1.84 |
| SocEc    | 4    | Data on capacity building                                                                                                                          | 1.82 |
| Ecol     | 3    | Best place for which type (multiple-use vs strictly protected) of protected area                                                                   | 1.80 |
| SocEc    | 13   | Health risks of traditional slash-and-burn farming vs more technologically and chemically improved farming in attempts to increase food production | 1.80 |
| SocEc    | 15   | Impact of plantation farming on small-holder farmers                                                                                               | 1.78 |
| Ecol     | 24   | Sustainable quotas for species harvesting in multiple-use protected areas                                                                          | 1.76 |
| Ecol     | 22   | Spatial ecology data for the investigation of species dynamics                                                                                     | 1.73 |
| Ecol     | 19   | Nutrient cycling                                                                                                                                   | 1.71 |
| SocEc    | 17   | Potential of psychological research on motivational values of biodiversity conservation                                                            | 1.71 |
| SocEc    | 6    | Data on inequality                                                                                                                                 | 1.61 |
| SocEc    | 20   | Role of tele-coupling / international trade in well-being of poor people                                                                           | 1.54 |
| Ecol     | 4    | Biomass data                                                                                                                                       | 1.51 |
| SocEc    | 7    | Data on international land deals                                                                                                                   | 1.47 |
| Ecol     | 5    | Carbon stock data                                                                                                                                  | 1.42 |
| Ecol     | 18   | Multi-trophic interactions                                                                                                                         | 1.42 |
| Ecol     | 23   | Species behavioral data                                                                                                                            | 1.41 |
| Ecol     | 25   | Taxonomic data (particularly for groups other than higher plants and vertebrates)                                                                  | 1.41 |
| SocEc    | 8    | Data on material footprint                                                                                                                         | 1.39 |
| Ecol     | 14   | Genetic diversity data                                                                                                                             | 1.33 |
| Ecol     | 13   | Functional / phylogenetic data                                                                                                                     | 1.22 |
